# Supplementary material
Source: PubMed Central journal article supplement (PMC3343351)
Supplement: embor201237s2.pdf [file embor201237s2.pdf]

Manuscript EMBOR-2011-35393

## **JNK regulates the photic response of the mammalian circadian clock**

Hikari Yoshitane, Sato Honma, Kiyomichi Imamura, Hiroto Nakajima, Shin-ya Nishide, Daisuke Ono, Hiroshi Kiyota, Naoya Shinozaki, Hirokazu Matsuki, Naoya Wada, Hirofumi Doi, Toshiyuki Hamada, Ken-ichi Honma and Yoshitaka Fukada

*Corresponding author: Yoshitaka Fukada, The University of Tokyo*

---

### **Review timeline:**

Submission date:

16 September 2011

Accepted:

20 February 2012

---

### **Transaction Report:**

No Peer Review Process File is available with this article, as the authors have chosen not to make the review process public in this case.
